# Supplementary material
Source: PubMed Central journal article supplement (PMC8374343)
Supplement: mmc2.pdf [file mmc2.pdf]

## Product datasheet

# Goat Anti-Rabbit IgG H&L (HRP) ab6721

★★★★★ 8 Abreviews 2835 References 6 Images

### Overview

---

|                            |                                                                                |
|----------------------------|--------------------------------------------------------------------------------|
| <b>Product name</b>        | Goat Anti-Rabbit IgG H&L (HRP)                                                 |
| <b>Host species</b>        | Goat                                                                           |
| <b>Target species</b>      | Rabbit                                                                         |
| <b>Tested applications</b> | <b>Suitable for:</b> IHC-P, WB, ELISA, Immunomicroscopy, Dot blot, ICC, IHC-Fr |
| <b>Immunogen</b>           | Rabbit IgG, whole molecule                                                     |
| <b>Conjugation</b>         | HRP                                                                            |

### Properties

---

|                             |                                                                                                                                                                                                                                                                                                                                                                                                                                                                                                                                                                                                            |
|-----------------------------|------------------------------------------------------------------------------------------------------------------------------------------------------------------------------------------------------------------------------------------------------------------------------------------------------------------------------------------------------------------------------------------------------------------------------------------------------------------------------------------------------------------------------------------------------------------------------------------------------------|
| <b>Form</b>                 | Liquid                                                                                                                                                                                                                                                                                                                                                                                                                                                                                                                                                                                                     |
| <b>Storage instructions</b> | Shipped at 4°C. Store at +4°C short term (1-2 weeks). Upon delivery aliquot. Store at -20°C. Avoid freeze / thaw cycle. Please see notes section. Store In the Dark.                                                                                                                                                                                                                                                                                                                                                                                                                                       |
| <b>Storage buffer</b>       | Preservative: 0.01% Gentamicin sulphate<br>Constituents: 0.42% Potassium phosphate, 0.88% Sodium chloride                                                                                                                                                                                                                                                                                                                                                                                                                                                                                                  |
| <b>Purity</b>               | Immunogen affinity purified                                                                                                                                                                                                                                                                                                                                                                                                                                                                                                                                                                                |
| <b>Purification notes</b>   | This product was prepared from monospecific antiserum by immunoaffinity chromatography using Rabbit IgG coupled to agarose beads.                                                                                                                                                                                                                                                                                                                                                                                                                                                                          |
| <b>Conjugation notes</b>    | Horseradish Peroxidase (HRP)                                                                                                                                                                                                                                                                                                                                                                                                                                                                                                                                                                               |
| <b>Clonality</b>            | Polyclonal                                                                                                                                                                                                                                                                                                                                                                                                                                                                                                                                                                                                 |
| <b>Isotype</b>              | IgG                                                                                                                                                                                                                                                                                                                                                                                                                                                                                                                                                                                                        |
| <b>General notes</b>        | HRP conjugated anti-rabbit secondary antibody optimized for western blot and immunohistochemistry. Some customers reported seeing brown precipitates in the vials. The brown precipitates are very common with HRP conjugated antibodies; we suggest vortexing the vial and using this antibody as normal. Our customer's feedback says the antibody worked great. If in case the antibody fails to give results then please contact our Scientific Support team for assistance.<br><br>Centrifuge product if not completely clear after standing at room temperature. Dilute only prior to immediate use. |

## Applications

### The Abpromise guarantee

Our [Abpromise guarantee](#) covers the use of ab6721 in the following tested applications.

The application notes include recommended starting dilutions; optimal dilutions/concentrations should be determined by the end user.

| Application      | Abreviews | Notes                                                                                                                                                                                                                                                                                         |
|------------------|-----------|-----------------------------------------------------------------------------------------------------------------------------------------------------------------------------------------------------------------------------------------------------------------------------------------------|
| IHC-P            | ★★★★★ (2) | 1/1000.                                                                                                                                                                                                                                                                                       |
| WB               | ★★★★★ (6) | 1/2000 - 1/20000.<br>Suggested working dilution of 1/3000 (see PMID: 17222046). In addition, found to work at 1/20000 (see PMID: 16936283).<br>Working dilutions are highlighted in the table below. Please note that the antibody can be diluted to 1:48,000 to 1:207,000 in many instances. |
| ELISA            |           | 1/120000.                                                                                                                                                                                                                                                                                     |
| Immunomicroscopy |           | Use at an assay dependent concentration.                                                                                                                                                                                                                                                      |
| Dot blot         |           | Use at an assay dependent concentration.                                                                                                                                                                                                                                                      |
| ICC              |           | 1/1000 - 1/5000.                                                                                                                                                                                                                                                                              |
| IHC-Fr           |           | 1/1000.                                                                                                                                                                                                                                                                                       |

## Images

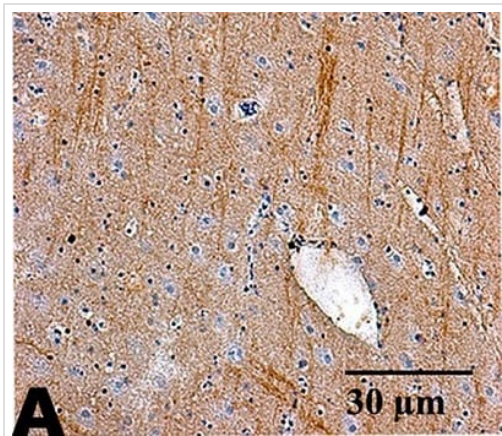

### Anti-phospho-tau immunostaining in *Dryocopus lineatus*.

Tau-positivity in the midbrain (**Panel A (shown)** and B) and the corpus callosum (C) of the *Dryocopus lineatus* brain. The axonal tract staining demonstrates a thread-like pattern, similar to that seen with Gallyas silver staining. Occasional intracellular tau-accumulations were identified within neurons (D).

For full method, please see paper.

Immunohistochemistry (Formalin/PFA-fixed paraffin-embedded sections) - Goat Anti-Rabbit IgG H&L

(HRP) (ab6721)

Farah et al PLoS One. 2018 Feb 2;13(2):e0191526. doi: 10.1371/journal.pone.0191526. eCollection 2018. Fig 3. Reproduced under the Creative Commons license <http://creativecommons.org/licenses/by/4.0/>

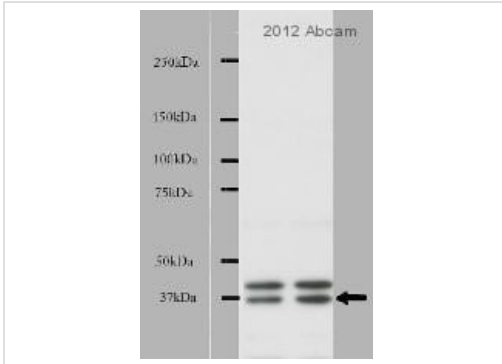

Western blot - Goat Anti-Rabbit IgG H&L (HRP) (ab6721)

This image is courtesy of an Abreview submitted by Maryna Polyakova.

**All lanes :** Anti-NEK7 antibody ([ab80948](#)) at 1/2000 dilution

**All lanes :** Mouse brain tissue cytoplasmic lysate

Lysates/proteins at 10 µg per lane.

**Secondary**

**All lanes :** Goat Anti-Rabbit IgG H&L (HRP) (ab6721) at 1/5000 dilution

Developed using the ECL technique.

Performed under reducing conditions.

**Exposure time:** 10 seconds

Blocked with 5% non-fat milk for 1 hour at 18°C

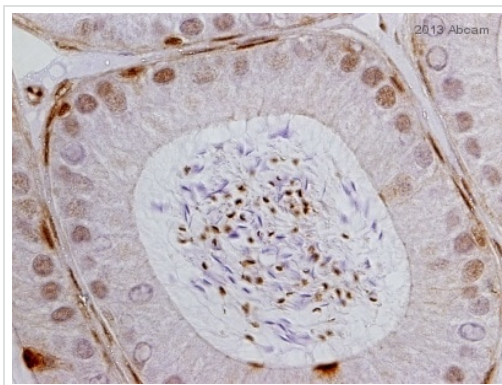

Immunohistochemistry (Formalin/PFA-fixed paraffin-embedded sections) - Goat Anti-Rabbit IgG H&L (HRP) (ab6721)

This image is courtesy of an anonymous Abreview.

**ab3580** staining glucocorticoid receptor in mouse epididymis tissue sections by Immunohistochemistry (IHC-P - paraformaldehyde-fixed, paraffin-embedded sections).

Tissue was fixed with Bouin's solution and blocked with 1.5% serum for 30 minutes at 25°C; antigen retrieval was by heat mediation in a citrate buffer. Samples were incubated with primary antibody (1/1000) for 14 hours at 4°C. An HRP-conjugated goat anti-rabbit IgG H&L (ab6721) (1/200) was used as the secondary antibody.

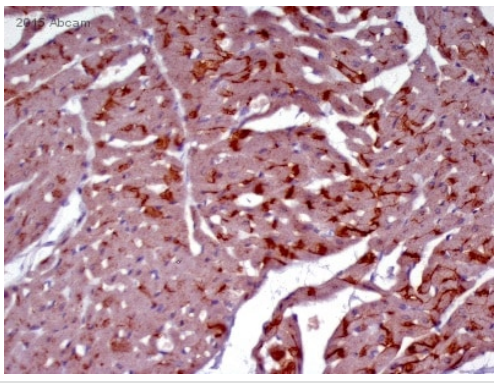

Immunohistochemistry (Formalin/PFA-fixed paraffin-embedded sections) - Goat Anti-Rabbit IgG H&L (HRP) (ab6721)

Image is courtesy of an anonymous AbReview.

Immunohistochemical analysis of PFA-fixed paraffin-embedded rat cardiac tissue sections, labeling Connexin 43 with [ab117843](#) at a dilution of 1/500 incubated for 12 hours at 4°C in 1% BSA in TBS. Antigen retrieval was via Tris-EDTA pH 9.0 (heat mediated). Blocking was 3% BSA incubated for 1 hour at 37°C. The secondary was ab6721 at 1/500.

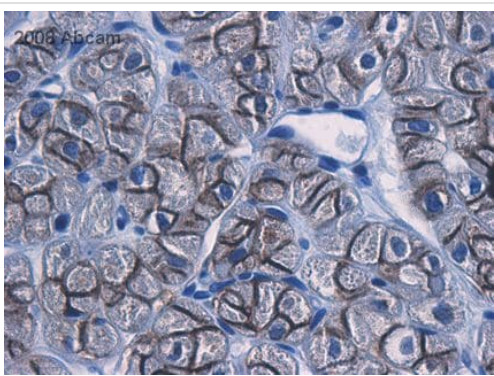

Immunohistochemistry (Formalin/PFA-fixed paraffin-embedded sections) - Goat Anti-Rabbit IgG H&L (HRP) (ab6721)

ab6721 was used at dilution 1/100 with the primary antibody [ab11370](#) in IHC-P. See the review on [ab11370](#).

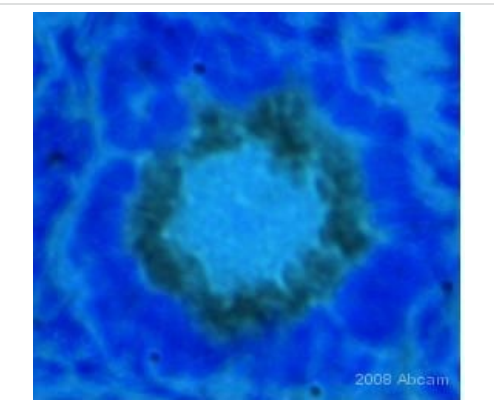

Immunohistochemistry (Frozen sections) - Goat Anti-Rabbit IgG H&L (HRP) (ab6721)

ab6721 was used at dilution 1/100 with the primary antibody [ab35604](#) in IHC-Fr. See the review on [ab35604](#).

**Please note:** All products are "FOR RESEARCH USE ONLY. NOT FOR USE IN DIAGNOSTIC PROCEDURES"

## **Our Abpromise to you: Quality guaranteed and expert technical support**

---

- Replacement or refund for products not performing as stated on the datasheet
- Valid for 12 months from date of delivery
- Response to your inquiry within 24 hours
  
- We provide support in Chinese, English, French, German, Japanese and Spanish
- Extensive multi-media technical resources to help you
- We investigate all quality concerns to ensure our products perform to the highest standards

If the product does not perform as described on this datasheet, we will offer a refund or replacement. For full details of the Abpromise, please visit <https://www.abcam.com/abpromise> or contact our technical team.

## **Terms and conditions**

---

- Guarantee only valid for products bought direct from Abcam or one of our authorized distributors
