# Supplementary material
Source: PubMed Central journal article supplement (PMC8374343)
Supplement: mmc3.pdf [file mmc3.pdf]

## Product datasheet

# Goat Anti-Mouse IgG H&L (HRP) ab6789

★★★★★ 2 Abreviews 746 References 4 Images

### Overview

|                            |                                                                                    |
|----------------------------|------------------------------------------------------------------------------------|
| <b>Product name</b>        | Goat Anti-Mouse IgG H&L (HRP)                                                      |
| <b>Host species</b>        | Goat                                                                               |
| <b>Target species</b>      | Mouse                                                                              |
| <b>Tested applications</b> | <b>Suitable for:</b> ICC, IP, Dot blot, ELISA, IHC-P, IHC-Fr, Immunomicroscopy, WB |
| <b>Immunogen</b>           | mouse IgG whole molecule                                                           |
| <b>Conjugation</b>         | HRP                                                                                |

### Properties

|                             |                                                                                                                                                                                                                                                                                                       |
|-----------------------------|-------------------------------------------------------------------------------------------------------------------------------------------------------------------------------------------------------------------------------------------------------------------------------------------------------|
| <b>Form</b>                 | Liquid                                                                                                                                                                                                                                                                                                |
| <b>Storage instructions</b> | Shipped at 4°C. Store at +4°C. Store In the Dark.                                                                                                                                                                                                                                                     |
| <b>Storage buffer</b>       | Preservative: 0.01% Gentamicin sulphate<br>Constituents: 0.878% Sodium chloride, 1% BSA, 0.424% Potassium phosphate                                                                                                                                                                                   |
| <b>Purity</b>               | Affinity purified                                                                                                                                                                                                                                                                                     |
| <b>Purification notes</b>   | This product was prepared from monospecific antiserum by immunoaffinity chromatography using mouse IgG coupled to agarose beads followed by solid phase adsorption(s) to remove any unwanted reactivities.                                                                                            |
| <b>Conjugation notes</b>    | Horseradish Peroxidase (HRP)                                                                                                                                                                                                                                                                          |
| <b>Clonality</b>            | Polyclonal                                                                                                                                                                                                                                                                                            |
| <b>Isotype</b>              | IgG                                                                                                                                                                                                                                                                                                   |
| <b>General notes</b>        | The product can contain small precipitates giving a cloudy appearance. However this does not affect the performance of the product. Leaving the product at room temperature in the dark for a few hours may help. Please use as normal and if you do experience problems, contact Scientific Support. |

### Applications

**The Abpromise guarantee** Our [Abpromise guarantee](#) covers the use of ab6789 in the following tested applications. The application notes include recommended starting dilutions; optimal dilutions/concentrations should be determined by the end user.

| Application      | Abreviews | Notes                                                     |
|------------------|-----------|-----------------------------------------------------------|
| ICC              |           | 1/500 - 1/2500.                                           |
| IP               |           | Use at an assay dependent concentration. PubMed: 17164758 |
| Dot blot         |           | Use at an assay dependent concentration.                  |
| ELISA            |           | 1/100000.                                                 |
| IHC-P            |           | 1/500 - 1/2500.                                           |
| IHC-Fr           |           | 1/500 - 1/2500.                                           |
| Immunomicroscopy |           | Use at an assay dependent concentration.                  |
| WB               | ★★★★★ (2) | 1/2000 - 1/10000. PubMed: 17413034                        |

## Images

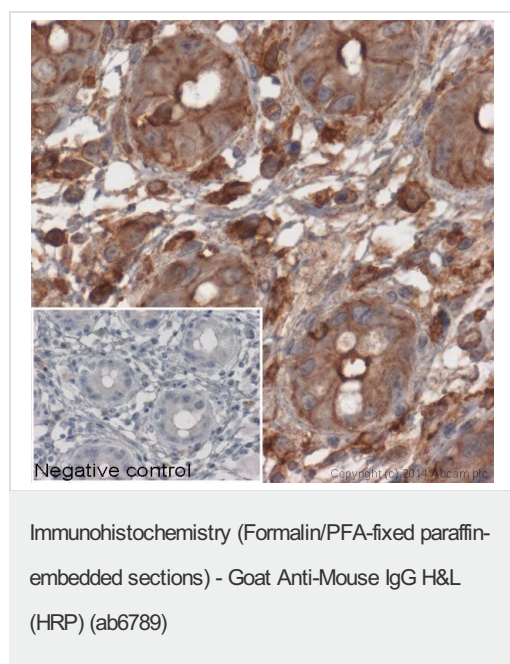

IHC image of beta actin staining in human colon formalin fixed paraffin embedded tissue section\*.

The section was pre-treated using pressure cooker heat mediated antigen retrieval with sodium citrate buffer (pH 6) for 30 mins. The section was incubated with [ab8224](#), 3 µg/ml overnight at +4°C. An HRP-conjugated secondary (ab6789, 1/2000 dilution) was used for 1hr at room temperature. The section was counterstained with hematoxylin and mounted with DPX.

The inset **negative control** image is secondary-only at 1/500 dilution.

\*Tissue obtained from the Human Research Tissue Bank, supported by the NIHR Cambridge Biomedical Research Centre

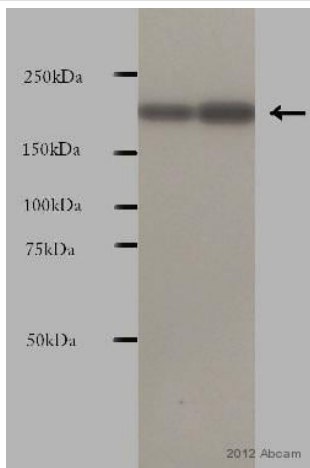

Western blot - Goat Anti-Mouse IgG H&L (HRP) (ab6789)

This image is courtesy of an anonymous Abreview.

**All lanes :** Anti-CDC42 Binding Protein Kinase Beta antibody (ab61328) at 1/2000 dilution

**All lanes :** Cytosolic fraction prepared from murine brain tissue

Lysates/proteins at 10 µg per lane.

**Secondary**

**All lanes :** Goat Anti-Mouse IgG H&L (HRP) (ab6789) at 1/2000 dilution

Developed using the ECL technique.

Performed under reducing conditions.

**Observed band size:** 194 kDa

**Exposure time:** 1 minute

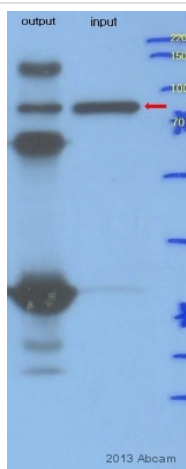

Immunoprecipitation - Goat Anti-Mouse IgG H&L (HRP) (ab6789)

This image is courtesy of an anonymous Abreview.

**ab49969** Immunoprecipitating HA Tag in HEK-293T whole cell lysate. 25 µg of cell lysate was incubated with primary antibody (1/2500 in lysis buffer) and matrix (Protein A/G) for 6 hours at 4°C. For western blotting a HRP-conjugated goat anti-mouse IgG H&L (ab6789) (1/1000) was used to confirm successful immunoprecipitation.

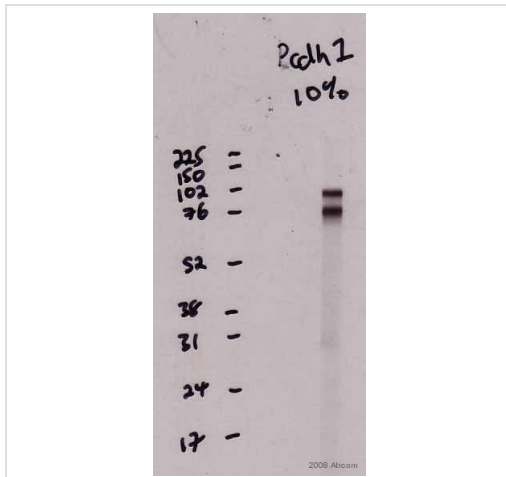

Western blot - Goat Anti-Mouse IgG H&L (HRP)  
(ab6789)

ab6789 was used at dilution 1/10000 with the primary antibody  
[ab55504](#) in WB. See the review on [ab55504](#).

**Please note:** All products are "FOR RESEARCH USE ONLY. NOT FOR USE IN DIAGNOSTIC PROCEDURES"

### Our Abpromise to you: Quality guaranteed and expert technical support

---

- Replacement or refund for products not performing as stated on the datasheet
- Valid for 12 months from date of delivery
- Response to your inquiry within 24 hours
- We provide support in Chinese, English, French, German, Japanese and Spanish
- Extensive multi-media technical resources to help you
- We investigate all quality concerns to ensure our products perform to the highest standards

If the product does not perform as described on this datasheet, we will offer a refund or replacement. For full details of the Abpromise, please visit <https://www.abcam.com/abpromise> or contact our technical team.

### Terms and conditions

---

- Guarantee only valid for products bought direct from Abcam or one of our authorized distributors
