# Supplementary material
Source: PubMed Central journal article supplement (PMC8374343)
Supplement: mmc4.pdf [file mmc4.pdf]

## Product datasheet

# HRP Anti-beta Actin antibody [AC-15] ab49900

★★★★★ 10 Abreviews 255 References 3 Images

### Overview

|                            |                                                                                                                                                                                                                                                                                                                                                                                                                                                                                                                                                                                                                 |
|----------------------------|-----------------------------------------------------------------------------------------------------------------------------------------------------------------------------------------------------------------------------------------------------------------------------------------------------------------------------------------------------------------------------------------------------------------------------------------------------------------------------------------------------------------------------------------------------------------------------------------------------------------|
| <b>Product name</b>        | HRP Anti-beta Actin antibody [AC-15]                                                                                                                                                                                                                                                                                                                                                                                                                                                                                                                                                                            |
| <b>Description</b>         | HRP Mouse monoclonal [AC-15] to beta Actin                                                                                                                                                                                                                                                                                                                                                                                                                                                                                                                                                                      |
| <b>Host species</b>        | Mouse                                                                                                                                                                                                                                                                                                                                                                                                                                                                                                                                                                                                           |
| <b>Conjugation</b>         | HRP                                                                                                                                                                                                                                                                                                                                                                                                                                                                                                                                                                                                             |
| <b>Tested applications</b> | <b>Suitable for:</b> WB                                                                                                                                                                                                                                                                                                                                                                                                                                                                                                                                                                                         |
| <b>Species reactivity</b>  | <p><b>Reacts with:</b> Mouse, Rat, Cow, Dog, Human, African green monkey</p> <p><b>Predicted to work with:</b> a wide range of other species <b>▲ Does not react with:</b> Drosophila melanogaster, Dictyostelium discoideum</p>                                                                                                                                                                                                                                                                                                                                                                                |
| <b>Immunogen</b>           | <p>Synthetic peptide corresponding to beta Actin (N terminal) conjugated to keyhole limpet haemocyanin.</p> <p>Sequence:</p> <p>DDIAALVIDNGSGK</p> <p style="text-align: right;"> <a href="#">Run BLAST with</a>      <a href="#">Run BLAST with</a> </p>                                                                                                                                                                                                                                                                                                                                                       |
| <b>Positive control</b>    | NIH 3T3 whole cell lysate ( <a href="#">ab7179</a> ) can be used as a positive control in WB. Chicken gizzard tissue cryosections. Human foreskin fibroblasts. Chicken fibroblasts. Rat dorsal root ganglion and Rat liver lysates                                                                                                                                                                                                                                                                                                                                                                              |
| <b>General notes</b>       | <p>The Life Science industry has been in the grips of a reproducibility crisis for a number of years. Abcam is leading the way in addressing this with our range of recombinant monoclonal antibodies and knockout edited cell lines for gold-standard validation. Please check that this product meets your needs before purchasing.</p> <p>If you have any questions, special requirements or concerns, please send us an inquiry and/or contact our Support team ahead of purchase. Recommended alternatives for this product can be found below, along with publications, customer reviews and Q&amp;As</p> |

### Properties

|                             |                                                                                                     |
|-----------------------------|-----------------------------------------------------------------------------------------------------|
| <b>Form</b>                 | Liquid                                                                                              |
| <b>Storage instructions</b> | Shipped at 4°C. Store at +4°C.                                                                      |
| <b>Storage buffer</b>       | <p>pH: 7.40</p> <p>Preservative: 0.01% Thimerosal (merthiolate)</p> <p>Constituent: 0.0268% PBS</p> |

|                     |                    |
|---------------------|--------------------|
| <b>Purity</b>       | Protein A purified |
| <b>Clonality</b>    | Monoclonal         |
| <b>Clone number</b> | AC-15              |
| <b>Isotype</b>      | IgG1               |

## Applications

**The Abpromise guarantee** Our [Abpromise guarantee](#) covers the use of ab49900 in the following tested applications.

The application notes include recommended starting dilutions; optimal dilutions/concentrations should be determined by the end user.

| Application | Abreviews  | Notes                                                  |
|-------------|------------|--------------------------------------------------------|
| WB          | ★★★★★ (10) | 1/25000 - 1/50000. Predicted molecular weight: 42 kDa. |

## Target

**Function** Actins are highly conserved proteins that are involved in various types of cell motility and are ubiquitously expressed in all eukaryotic cells.

**Involvement in disease** Defects in ACTB are a cause of dystonia juvenile-onset (DYTJ) [MIM:607371]. DYTJ is a form of dystonia with juvenile onset. Dystonia is defined by the presence of sustained involuntary muscle contraction, often leading to abnormal postures. DYTJ patients manifest progressive, generalized, dopa-unresponsive dystonia, developmental malformations and sensory hearing loss.

**Sequence similarities** Belongs to the actin family.

**Post-translational modifications** ISGylated.

**Cellular localization** Cytoplasm > cytoskeleton. Localized in cytoplasmic mRNP granules containing untranslated mRNAs.

## Images

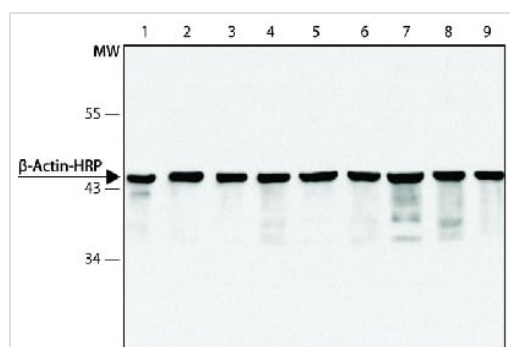

Western blot - HRP Anti-beta Actin antibody [AC-15] (ab49900)

**All lanes** : HRP Anti-beta Actin antibody [AC-15] (ab49900) at 1/50000 dilution

**Lane 1** : A549 Lysate

**Lane 2** : HeLa Lysate

**Lane 3** : 3T3 Lysate

**Lane 4** : NRK Lysate

**Lane 5** : MDCK Lysate

**Lane 6** : MDBK Lysate

**Lane 7** : BHK Lysate

**Lane 8** : COS7 Lysate

**Lane 9** : CFB Lysate

Developed using the ECL technique.

**Predicted band size:** 42 kDa

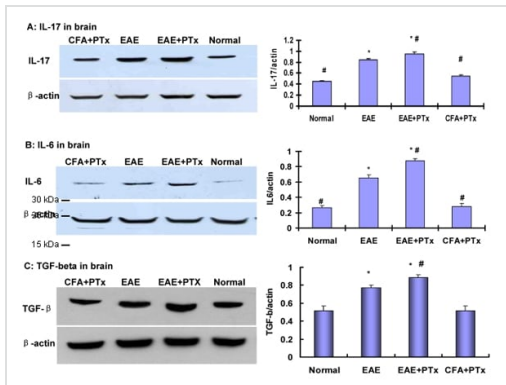

Western blot - HRP Anti-beta Actin antibody [AC-15] (ab49900)

Image from PLoS One. 2010 Aug 25;5(8):e12400. Fig 8, doi: 10.1371/journal.pone.0012400. Reproduced under the Creative Commons license <http://creativecommons.org/licenses/by/4.0/>

Proteins were loaded onto a 10% SDS-polyacrylamide gel. After gel electrophoresis, blots were subsequently probed with primary antibodies anti-IL-6 at 1:1000 (ab6672), anti-IL-17 at 1:3000, anti-TGF-β at 1:1000 (ab66043). For detection, horseradish peroxidase-conjugated secondary anti-rabbit antibody was used followed by enhanced chemiluminescence development.

Normalization of results was ensured by running parallel western blots with β-actin antibody at 1:25,000 (ab49900). The optical density was quantified using an image densitometer. The data are presented as a percentage of target protein relative to β-actin. A value of  $p < 0.05$  is considered significant.

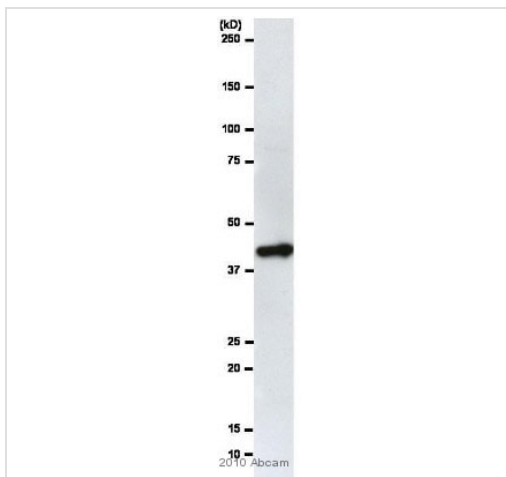

Western blot - HRP Anti-beta Actin antibody [AC-15] (ab49900)

This image is courtesy of an anonymous Abreview

HRP Anti-beta Actin antibody [AC-15] (ab49900) at 1/25000 dilution + Whole cell lysate of Human acute monocytic leukemia THP-1. at 10 μg

Developed using the ECL technique.

Performed under reducing conditions.

**Predicted band size:** 42 kDa

**Blocking Step:** 5% Milk for 1 hour at 22°C.

**Please note:** All products are "FOR RESEARCH USE ONLY. NOT FOR USE IN DIAGNOSTIC PROCEDURES"

### Our Abpromise to you: Quality guaranteed and expert technical support

- Replacement or refund for products not performing as stated on the datasheet
- Valid for 12 months from date of delivery
- Response to your inquiry within 24 hours
- We provide support in Chinese, English, French, German, Japanese and Spanish

- Extensive multi-media technical resources to help you
- We investigate all quality concerns to ensure our products perform to the highest standards

If the product does not perform as described on this datasheet, we will offer a refund or replacement. For full details of the Abpromise, please visit <https://www.abcam.com/abpromise> or contact our technical team.

### **Terms and conditions**

---

- Guarantee only valid for products bought direct from Abcam or one of our authorized distributors
