# Supplementary material
Source: PubMed Central journal article supplement (PMC8374343)
Supplement: mmc7.pdf [file mmc7.pdf]

## Certificate of Analysis

**Product Description:** SARS-CoV / SARS-CoV-2 (COVID-19) spike antibody [1A9]  
**Catalog Number:** GTX632604  
**Lot No.** 43913  
**Expiration Date:** 12 months from the shipping date

**Constituents:** PBS

**Preservatives:** None

**Conjugation:** Unconjugated

**Endotoxin:** N/A

**Testing:** The antibody reacts with SARS-CoV-2 (COVID-19) Spike S2 identified by WB, ICC/IF, IHC-P, FACS, IP, ELISA, EM, Sandwich ELISA, IHC-P (cell pellet)

**Purification:** Affinity purified by Protein G.

**Storage:** Store as concentrated solution. Centrifuge briefly prior to opening vial. For short-term storage (1-2 weeks), store at 4°C. For long-term storage, aliquot and store at -20°C or below. Avoid multiple freeze-thaw cycles.

This product did not originate from a facility handling exotic livestock or avian disease agents.

If turbidity occurs upon prolonged storage, clarify the solution by centrifugation before use. Working dilution samples should be discarded if not used within 12 hours. For research use only. Not for diagnostic or therapeutic use.
