# Supplementary material
Source: PubMed Central journal article supplement (PMC8374343)
Supplement: mmc9.pdf [file mmc9.pdf]

# Full length Blots for Publication \_ HEK ACE2 Figure 5b

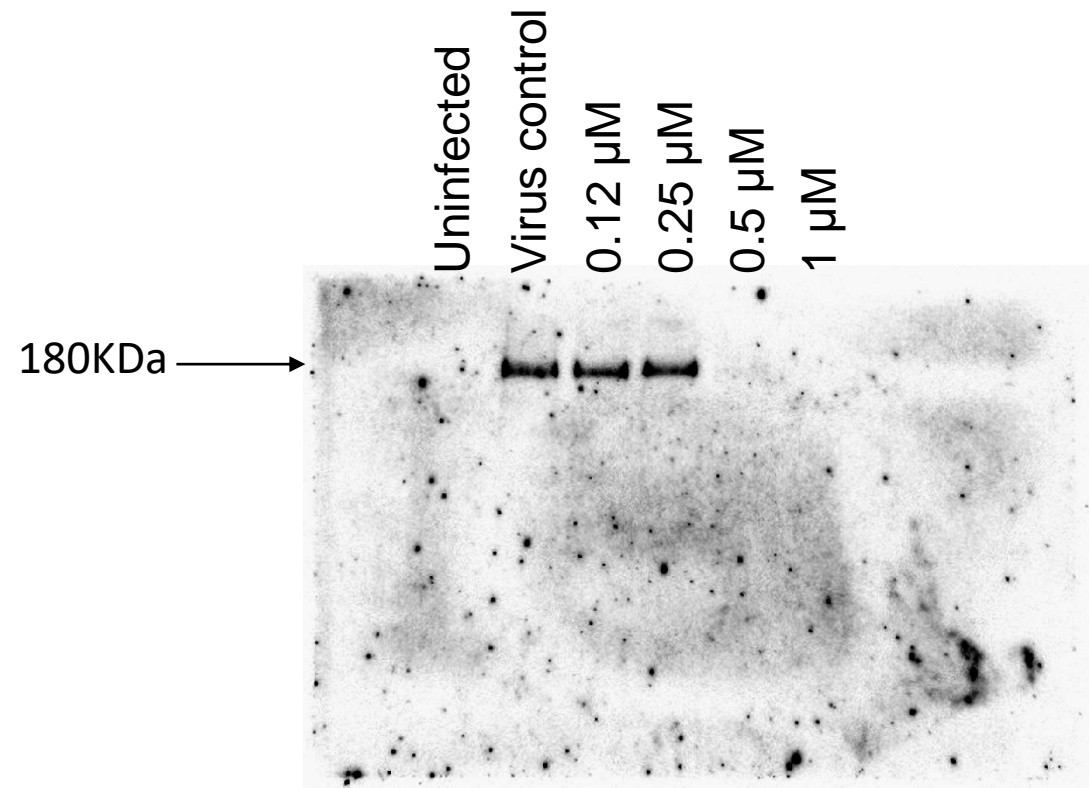

Spike=180 KDa

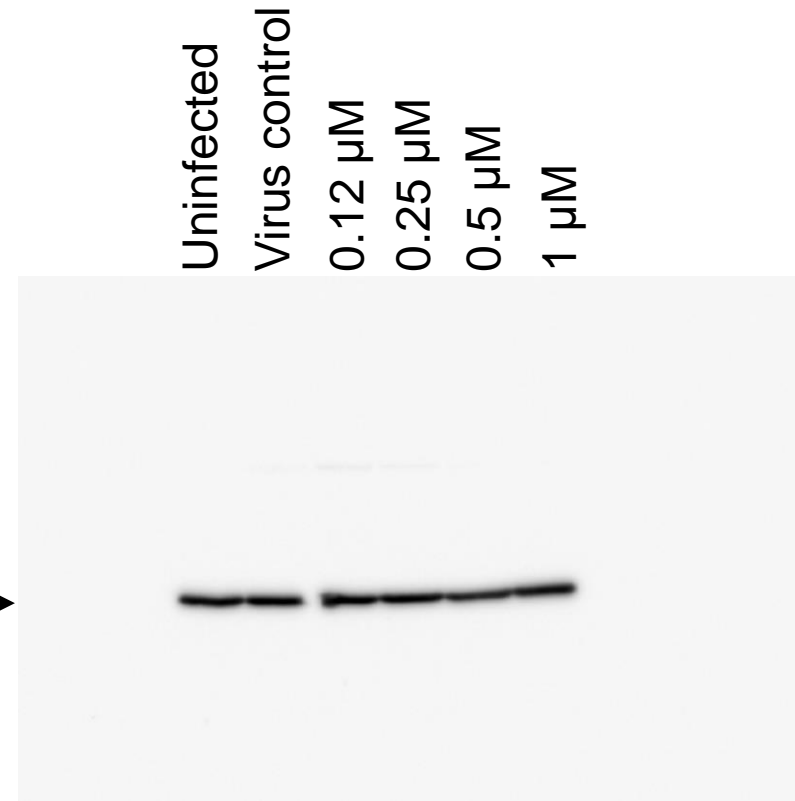

Beta actin=42 KDa

# Full length Blots for Publication \_ VERO E6 Figure 5h

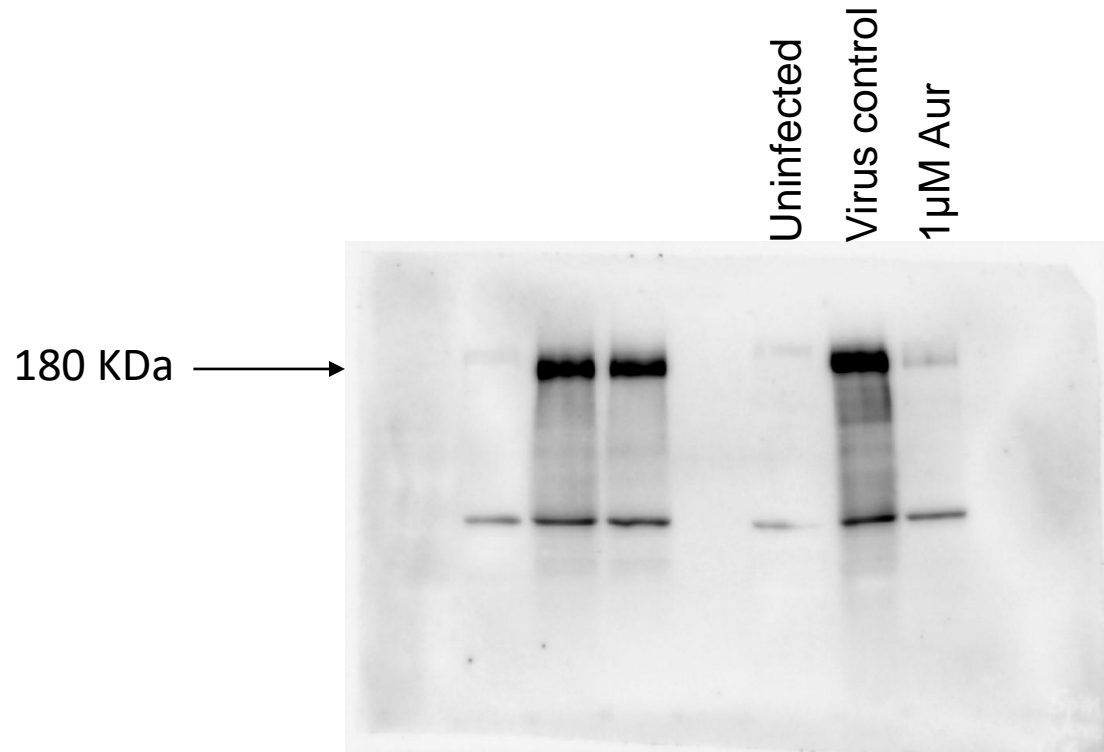

Spike=180 KDa

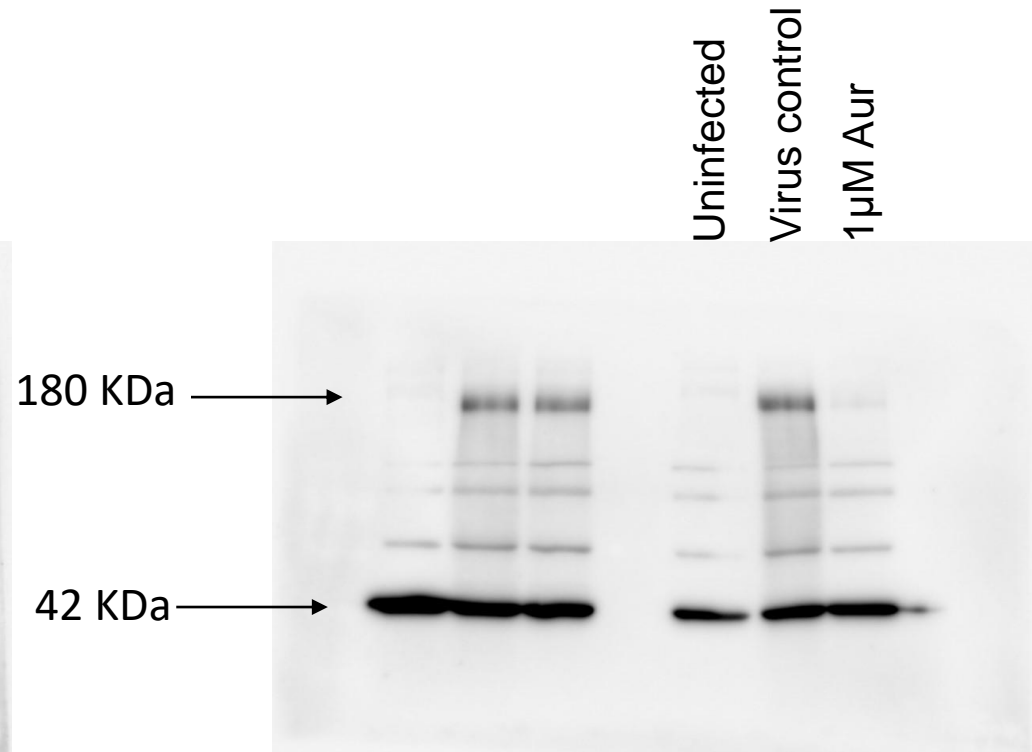

Beta actin=42 KDa
